# Supplementary material
Source: PubMed Central journal article supplement (PMC3754578)
Supplement: JB.00242-13_zjb999092706so1.pdf [file JB.00242-13_zjb999092706so1.pdf]

## **Supplementary information**

### **MtvR is a global regulatory sRNA in *Burkholderia cenocepacia***

Christian G. Ramos<sup>2</sup>, André M. Grilo<sup>2</sup>, Paulo J. P. da Costa<sup>2</sup>, Joana R. Feliciano<sup>2</sup> and Jorge H. Leitão<sup>1,2\*</sup>

<sup>1</sup>Department of Bioengineering, <sup>2</sup>Institute for Biotechnology and Bioengineering, Instituto Superior Técnico, Universidade Técnica de Lisboa, Av. Rovisco Pais, Torre Sul, Piso 6, 1049-001, Lisboa, Portugal.

\*Corresponding author: Fax: +351 218419199; E-mail: [jorgeleitao@ist.utl.pt](mailto:jorgeleitao@ist.utl.pt)

## Supplementary Methods

### Assessment of anti-MtvR transcripts

The time required by the anti-MtvR transcript to silence MtvR was assessed using *B. cenocepacia* J2315 transformed with plasmid pCGR16, grown for 24h (t = 0), time after which the expression of anti-MtvR was induced by the addition of 1% of L-arabinose (final concentration) to the culture. Samples were taken after 0, 5 and 10 min. RNA was extracted and processed as described in the main text.

### Bioinformatic analysis

The MtvR sRNA sequence was aligned with the RNA sequence of the putative mRNA targets, predicted by the sRNATarget software (1), using the RNAHybrid web tool (2). In order to predict potential sigma-factor binding sites in putative MtvR mRNA targets, regulated by  $\sigma^{70}$  transcription factor, the BPROM software (Softberry, Inc., Mt. Kisco, NY) bioinformatics tool (minimum score of 7) and MEME suite webserver (3) were used. The alignment of the MtvR encoding sequences from Bcc strains was performed using Clustal W (4).

### EMSA experiments with RNA chaperones

The ability of 25 nM (final concentration) of MtvR to bind to Hfq (concentrations ranging from 0.1 to 200 nM of the hexameric form of Hfq (Hfq<sub>6</sub>)), or to Hfq2 (concentrations ranging from 0.1 to 200 nM of the trimeric form of Hfq2 (Hfq2<sub>3</sub>)), was also evaluated with EMSA assays. Non-labelled yeast tRNA (Ambion) was added in excess to each sample to minimize non-specific binding. Incubation, resolution of RNA-RNA and RNA-protein complexes and detection of band-shifts was performed as previously described (5).

## Supplementary Figures

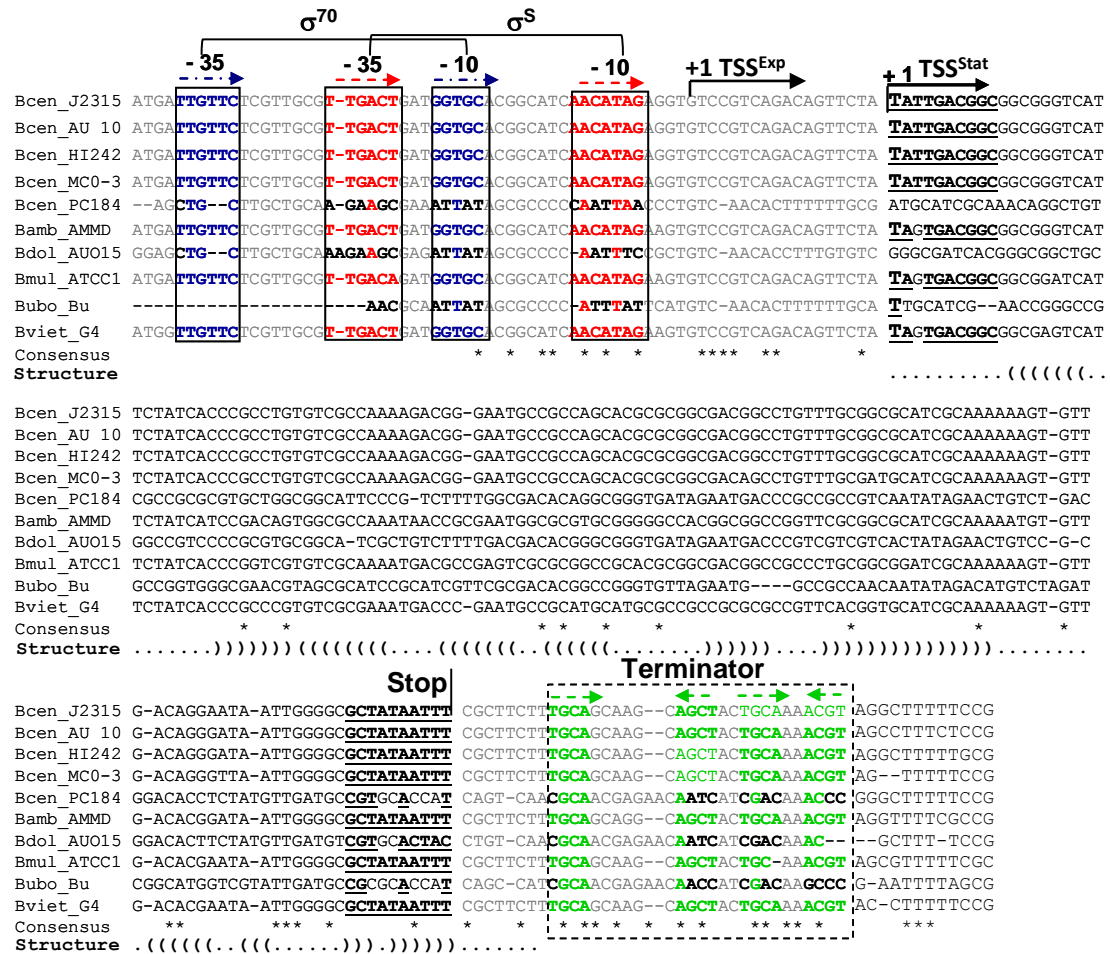

**FIG S1. MtvR is exclusive to Bcc strains.** Sequence alignment of the MtvR homologues of the indicated *Burkholderia* strains. Transcribed sequences are shown in black, non-transcribed elements are shown in grey. The putative  $\sigma^{70}$  (blue, p value =  $4.84e^{-4}$ ) and  $\sigma^S$  (red, p value =  $2.37e^{-3}$ ) regulatory sequences predicted using the MEME suite webserver are indicated. Non conserved nucleotides in regulatory sequences are shown in black. The MtvR Transcription Start Sites (TSS) are represented by capital casing with the conserved nucleotides shown in bold and underlined (exp, exponential; stat, stationary phase). The Transcription Stop Site is indicated by an underlined bold sequence, and the terminator sequences are represented in green, with the non-conserved nucleotides in black. Asterisks below the sequences indicate conserved nucleotides. Bcen, *B. cenocepacia*; Bamb, *B. ambifaria*; Bdol, *B. dolosa*; Bmul, *B. multivorans*; Bubo, *B. ubonensis*; Bviet, *B. vietnamiensis*.

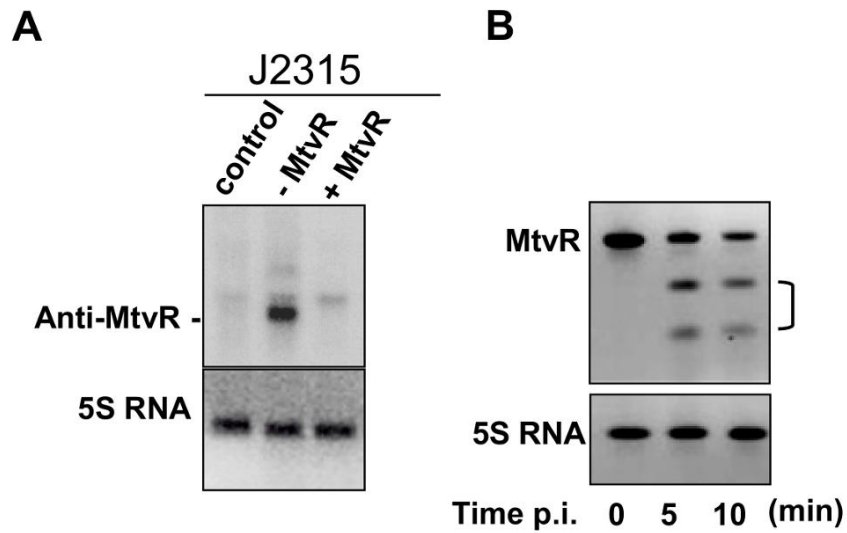

**FIG S2. *hfq* mRNA levels are affected by MtvR.** A) Northern blot analysis of the transcript designed to silence MtvR in wt, wt overexpressing the anti-MtvR RNA (-MtvR), and wt overexpressing MtvR (+ MtvR). B) Effects of expression of the anti-MtvR on the MtvR levels, after induction with 2% L-arabinose for the indicated time. Putative processing products are marked with bracket.



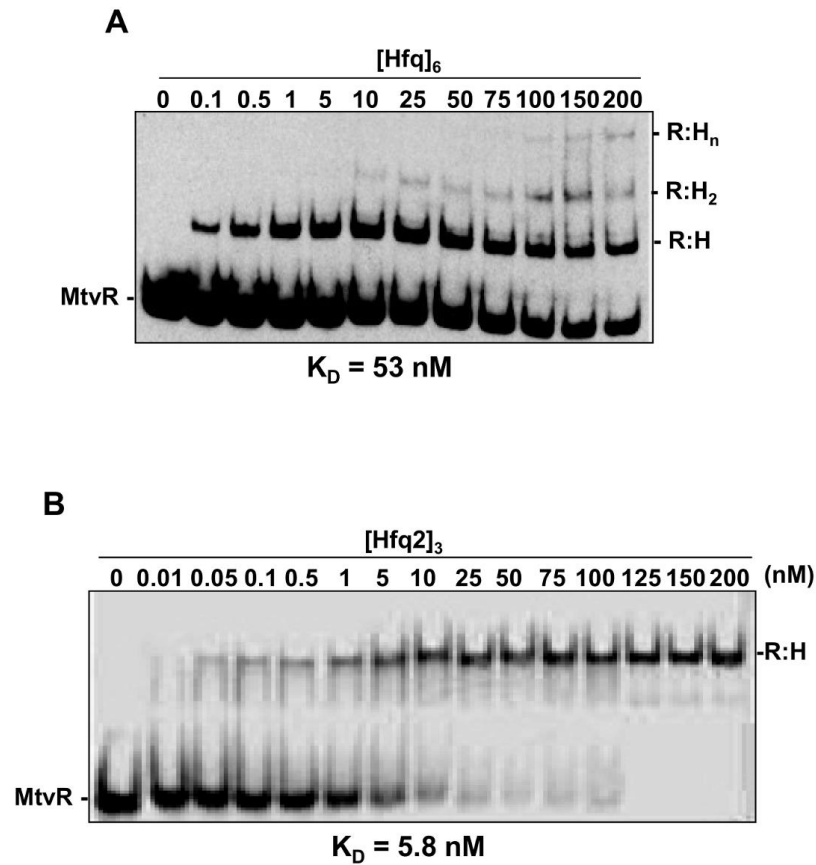

**FIG S4. MtvR binds to Hfq and Hfq2.** EMSA assays performed to assess the ability of Hfq (A), or Hfq2 (B) to bind to 25 nM of MtvR. The estimated  $K_D$  values are shown. Concentrations of the RNA chaperones were calculated based on their respective multimeric state, hexameric for Hfq and trimeric for Hfq2, respectively.

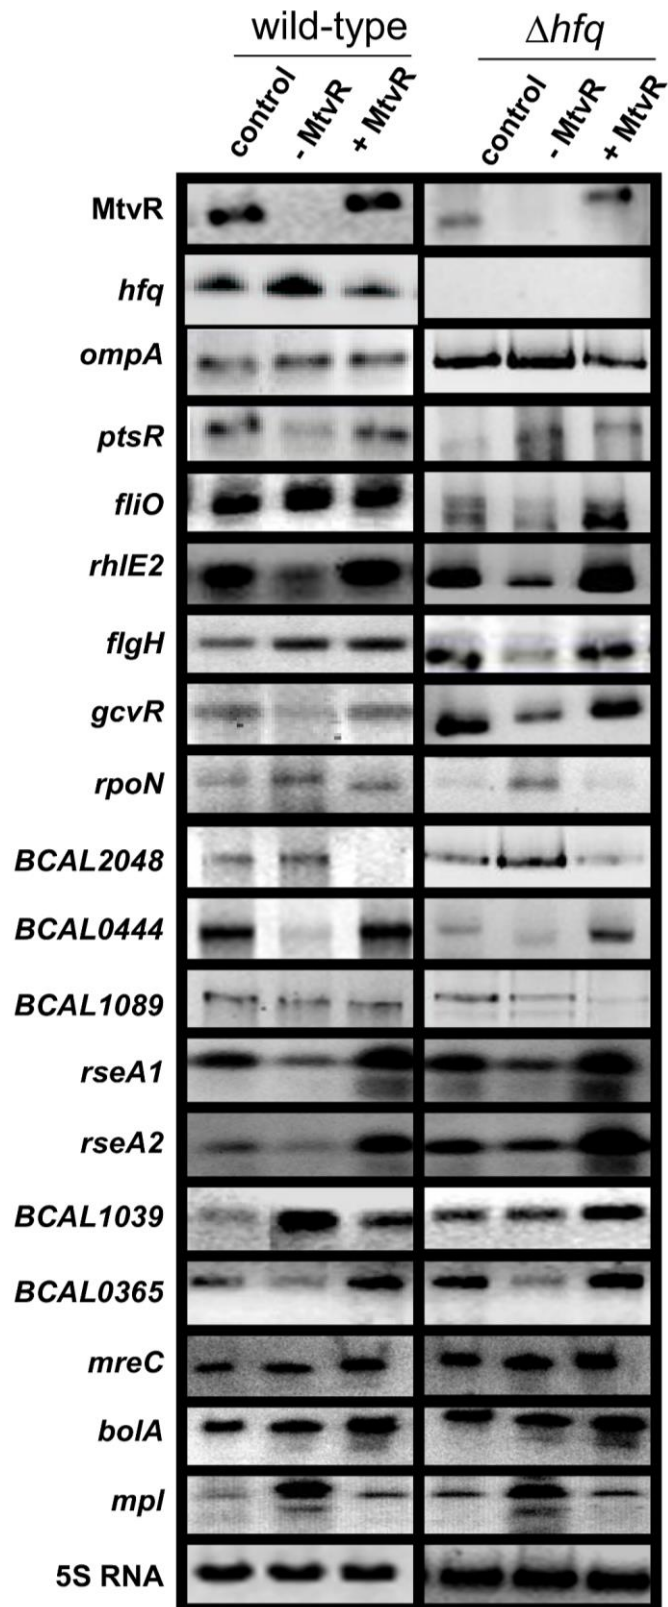

**FIG S5. MtvR affects multiple genes.** Northern blot analysis of the effect of MtvR on the mRNA levels of selected predicted targets. Total RNA from the wt (control) and derivative strains with the MtvR silenced (-MtvR), or overexpressing MtvR (+MtvR), and from the  $\Delta hfq$  mutant (CJ1), the CJ1 with MtvR silenced (-MtvR), and the CJ1 overexpressing MtvR (+MtvR) was probed.

## Supplementary Tables

**Table S1.** Bacterial strains and plasmids used in this work.

| Strain or plasmid                     | Description                                                               | Reference or source |
|---------------------------------------|---------------------------------------------------------------------------|---------------------|
| <i>B. cenocepacia</i> J2315           | CF sputum isolate                                                         | (7)                 |
| <i>B. cenocepacia</i> CJ1             | <i>B. cenocepacia</i> J2315 <i>hfq</i> mutant                             | (8)                 |
| <i>B. cenocepacia</i> CJ2             | <i>B. cenocepacia</i> J2315 <i>hfq2</i> mutant                            | (8)                 |
| <i>B. cenocepacia</i><br>J2315+pCGR15 | <i>B. cenocepacia</i> J2315 overexpressing MtvR                           | This study          |
| <i>B. cenocepacia</i><br>CJ1+pCGR15   | <i>B. cenocepacia</i> J2315 <i>hfq</i> mutant overexpressing MtvR         | This study          |
| <i>B. cenocepacia</i><br>J2315+pCGR16 | <i>B. cenocepacia</i> J2315 with the sRNA MtvR silenced                   | This study          |
| <i>B. cenocepacia</i><br>CJ1+pCGR16   | <i>B. cenocepacia</i> J2315 <i>hfq</i> mutant with the sRNA MtvR silenced | This study          |



| Plasmids |                                                                                                                                                                                                             |            |
|----------|-------------------------------------------------------------------------------------------------------------------------------------------------------------------------------------------------------------|------------|
| pMLBAD   | Tmp <sup>R</sup> ; used for inducible gene expression                                                                                                                                                       | (9)        |
| pBBR1MCS | Cm <sup>R</sup> ; used for constitutive gene expression                                                                                                                                                     | (10)       |
| pCR 2.1  | Amp <sup>R</sup> ; Km <sup>R</sup> ; used <i>in vitro</i> transcription                                                                                                                                     | Invitrogen |
| pCGR4    | pET23a+ with the <i>hfq</i> encoding sequence clone                                                                                                                                                         | (5)        |
| pCGR14   | pCR 2.1 with the 140 bp cDNA fragment corresponding to the <i>mtvR</i> sRNA cloned in the XbaI/HindIII sites, and a Cm <sup>R</sup> cassette (obtained by PCR from plasmid 0pKD3) cloned in the HincII site | This study |
| pCGR14.1 | pCGR14 digested and self-ligated in the HaeIII sites                                                                                                                                                        | This study |
| pCGR15   | pMLBAD with the 140 bp cDNA fragment corresponding to the <i>MtvR</i> sRNA cloned in the EcoRI/XbaI sites (pBAD promoter control)                                                                           | This study |
| pCGR16   | pMLBAD with the 140 bp cDNA fragment corresponding to the <i>MtvR</i> sRNA cloned in the XbaI/HindIII sites (pBAB promoter control)                                                                         | This study |
| pCGR20   | pCR 2.1 with the 140 bp cDNA fragment corresponding to the <i>mtvR</i> sRNA cloned in the XbaI/HindIII sites (T7 promoter control)                                                                          | This study |
| pCGR24   | pCR 2.1 with the 384 bp cDNA fragment corresponding to the <i>hfq</i> 5'-UTR cloned in the XbaI/HindIII sites (T7 promoter control)                                                                         | This study |

|        |                                                                                                                                                                                                |            |
|--------|------------------------------------------------------------------------------------------------------------------------------------------------------------------------------------------------|------------|
| pCGR25 | pCR 2.1 with the 609 bp cDNA fragment corresponding to the <i>hfq</i> full mRNA (5'-UTR and CDS) with 6 histidine at the C-terminus, cloned in the XbaI/HindIII sites<br>(T7 promoter control) | This study |
| pCGR33 | pMLBAD with the 5'-UTR- <i>hfq</i> -LacZ DNA fragment (pBAB promoter disrupted, only replicative)                                                                                              | This study |

---

**Table S2.** Oligonucleotides and primers used in this work.

| Name    | Purpose                                 | Sequence 5' –3'               | Source     |
|---------|-----------------------------------------|-------------------------------|------------|
| UF      | Cloning mtvR                            | TTTCTAGATATTGACGGCGGCGGGU     | This study |
| LF      | Cloning mtvR                            | TTAAGCTTAAATTATAGCGCCCAATTA   | This study |
| NP      | Northern analysis of mtvR               | CTATCACCCGCCTGTGTCGCCA        | This study |
| OMPA    | Northern blot probe for <i>ompA</i>     | AAAAGCTTGTGGCCGGAAC           | This study |
| PTSR    | Northern blot probe for <i>ptsR</i>     | CGCCTCCAGGTATTTCGTACA         | This study |
| FLIO    | Northern blot probe for <i>fliO</i>     | ATCTCGACGATCGTCGCGCTTTCCTTC   | This study |
| RHLE2   | Northern blot probe for <i>rhLE2</i>    | TACGGCCGATCCGGTGACGTAG        | This study |
| FLGH    | Northern blot probe for <i>flgH</i>     | CATCGGCATCGGCGGCTGCGCCGTCATC  | This study |
| GCVR    | Northern blot probe for <i>gcvR</i>     | CGAGGCGCGGGACGAGCCACGCGGAT    | This study |
| RECQ    | Northern blot probe for <i>recQ</i>     | GCGACCTGGTCCTGCATCAGCGCGAT    | This study |
| RPON    | Northern blot probe for <i>rpoN</i>     | GATCAGTGCGTGCGCGTCGCGCA       | This study |
| RPSL    | Northern blot probe for <i>rpsL</i>     | GCCGCGACGCTGGGGGCAGTCCTGCAGGG | This study |
| 2048    | Northern blot probe for <i>BCAL2048</i> | TTCGGCTTCGACACGAACGTGCCCTT    | This study |
| 0444    | Northern blot probe for <i>BCAL0444</i> | CGCCTCCAGGTATTTCGTACA         | This study |
| 1089    | Northern blot probe for <i>BCAL1089</i> | CTCGGTGTGCTGGTTCGTGCGGATC     | This study |
| HFQ     | Northern blot probe for <i>hfq</i>      | AAAGGGCAATTGTTACAAG           | (8)        |
| CGRO105 | Northern blot probe for <i>rseA2</i>    | TGCGGTAAACGCGACGCTCA          | This study |
| CGRO106 | Northern blot probe for <i>rseA1</i>    | GGTGGTAATGGGCCACGCA           | This study |

|         |                                         |                                           |            |
|---------|-----------------------------------------|-------------------------------------------|------------|
| CGRO107 | Northern blot probe for <i>BCAL1039</i> | CGGCGGATGTAGCGGAACAGG                     | This study |
| CGRO108 | Northern blot probe for <i>BCAL0365</i> | GCAGTGACACGAATCGGCGGG                     | This study |
| CGRO109 | Northern blot probe for <i>BCAL0640</i> | GATCCCGCGCACAGCAGCAT                      | This study |
| CGRO110 | Northern blot probe for <i>mpl</i>      | GTGGTCGTCTTGCCGTGCGT                      | This study |
| CGRO111 | Northern blot probe for <i>mreC</i>     | TGGTTGGCCTGCGTGGACAG                      | This study |
| CGRO112 | Northern blot probe for <i>bolA</i>     | GCACGGTGAGCGACAGCGG                       | This study |
| CGRO113 | MtvR mutagenesis                        | TTTCTAGATATTGACTTGCTGCTTTATCACCC          | This study |
| CGRO114 | MtvR mutagenesis                        | TTAAGCTTAAATTATAGCCGAGGAATTA              | This study |
| CGRO115 | <i>hfq</i> mutagenesis                  | TTTCTAGAGCACCGAGGGCAAGGGCTAG              | This study |
| CGRO116 | <i>hfq</i> mutagenesis                  | TTAAGCTTTTGGCTGGCTTAAAA                   | This study |
| CGRO121 | Fwd primer <i>hfq</i> 5'-UTR            | TTGGATCCATTGGACGAGGCTTCCGC                | This study |
| CGRO122 | Rev primer <i>hfq</i> 5'-UTR            | TTGGATCCCATGGCGTACTCCATCTTTT              | This study |
| CGRO123 | Fwd primer <i>hfq</i> his-tag           | TTTCTAGAGCACGTCCCGCAAGGGCTAG              | This study |
| CGRO124 | Rev primer <i>hfq</i> his-tag           | TTGGATCCATTGTGGTGGTGGTGGTGGGACGAGGCTTCCGC | This study |
| M13FWD  | LacZ amplification                      | GTAAAACGACGGCCAGT                         | Invitrogen |
| M13REV  | LacZ amplification                      | AGCGGATAACAATTCACACAGGA                   | Invitrogen |
| 5S      | Northern blot probe for 5S rRNA         | TTCGGGATGGGAAGGGGTGGGA                    | (8)        |
| 5R-MT   | 5' RACE experiments                     | ATACGGGGCTGCGAGAGTCGT                     | This study |

**Table S4.** Potential MtvR targets in *B. cenocepacia* J2315 genome

| <b>Gene</b>   | <b>Function</b>                                                                                           | <b>Locus Tag</b> |
|---------------|-----------------------------------------------------------------------------------------------------------|------------------|
| <i>hfq</i>    | RNA chaperone and Pleiotropic regulator                                                                   | BCAL1879         |
| <i>recQ</i> * | ATP-dependent DNA helicase RecQ                                                                           | BCAL0228         |
| <i>rpoN</i>   | Nitrogen limitation response transcription regulator                                                      | BCAL0813         |
| <i>rpsL</i> * | Ribosomal subunit involved in translational accuracy. Important for ribosome structure                    | BCAL0229         |
| <i>flgH</i>   | The flagellar L-ring protein precursor protects the motor/basal body from shearing forces during rotation | BCAL0570         |
| <i>rhlE2</i>  | ATP-dependent RNA helicase                                                                                | BCAL2412         |
| <i>fliO</i>   | Essential component of the flagellum-specific protein export apparatus                                    | BCAL3504         |
| <i>gcvR</i>   | <i>gcvA</i> LysR family transcriptional regulator                                                         | BCAL0382         |
| BCAL2048      | GntR regulator of a transport cluster (Fe-S), MFS type                                                    | BCAL2048         |
| BCAL0444      | GntR regulator of a transport cluster, ABC type                                                           | BCAL0444         |
| <i>ptsR</i>   | PTS regulator                                                                                             | BCAL0777         |
| BCAL1089      | AnsC regulator of a ABC transport cluster                                                                 | BCAL1089         |
| <i>rseA1</i>  | $\sigma^E$ negative regulatory protein 1                                                                  | BCAL2871         |
| <i>rseA2</i>  | $\sigma^E$ negative regulatory protein 2                                                                  | BCAL0999         |
| BCAL1039      | ATP-binding cassette transporter protein                                                                  | BCAL1039         |
| BCAL0365      | Major facilitator Superfamily transporter protein                                                         | BCAL0365         |
| <i>mpl</i>    | UDP-N-acetylmuramate:L-alanyl-gamma-D-glutamyl-meso-diaminopimelate ligase                                | BCAL3416         |
| <i>mreC</i>   | Rod-shape determining protein                                                                             | BCAL0481         |
| <i>bolA</i>   | Cell shape                                                                                                | BCAL1984         |

\* mRNA predicted MtvR targets which mRNA levels were not affected by MtvR.



TARGET : gcvR  
mfe: -39.8 kcal/mol

```

target 5'          C A G AAC U A CUA A A UC GAAUA U 3'
                  GGC G CGCG GGU CAUUC GUUUUU GCGA AGA GAC UCGUU
                  CCG C GCGC CCG GUAAG CAGAAA CGCU UCU CUG GGCAG
sRNA 3' UUUAAUAUCGCGGGGUAAUAAGGACAGUUGUGAAAAACGCUACGCGGCGUUUGU GCAG G GCACGA CC GG AC GUGUCCGCCACUA UA GGCGGC UUAU 5'

```

TARGET : BCAL2048  
mfe: -58.2 kcal/mol

```

target 5'          AU UA CUCG A GUCAUA A CC CCCC AA G 3'
                  CGCC CGC GCUGGC CA UCCC UCUU ACA GU UGA GAUG ACCC CGUCGU
                  GCGG GCG CGACCG GU AGGG AGAA UGU CG ACU UUAC UGGG GCGGCA
sRNA 3' UUUAAUAUCGCGGGGUAAUAAGGACAGUUGUGAAAAACGCUACGCGGCGUUUGUCCGGCA C CA CC A C AACCGCUG C CCC AUC CG GUUAU 5'

```

TARGET : BCAL0444  
mfe: -64.4 kcal/mol

```

target 5' A C A C U ACCA A U AAC U C C 3'
          UAUGGCGCCCU GUU UUC UC AUA GC CCGC GCC UGCC CG UG C GC CCCG GCG C CAG GC
          AUAUCGCGGGG UAA AAG AG UGU CG GGCG CGG GCGG GC AC G CG GGGC CGC G GUC CG
sRNA 3' UUUAA U U GAC U GAAAAACGCUA C UUUGUC CA C GCACG C C UAA AGAAAAAC U U CCCACUAUCUUACUGGGCGGCGCAGUUUAU 5'

```

TARGET : ptsR  
mfe: -72.3 kcal/mol

```

target 5' U A U G U A A C GA A GGAAA G G CGA U 3'
          GCGUUC CU UCGACG GUCG AGA UCGUCG CCG C CG G GGC CAU CCG CU GGC AC GGC GCCCG
          CGCGGG GA AGUUGU CGGC UUU GGCAGC GGC G GC C CCG GUA GGC GA CCG UG CCG UGGGC
sRNA 3' UUUAAUAU GUUAAUAAG C GAAAAACGCUACG G GUCC C A GA CC AG A AAA CUG U CCCACUAUCUUAC GCGGCGAGUUUAU 5'

```

TARGET : BCAL1089  
mfe: -35.5 kcal/mol

```

target 5' A AA A A G A GA AC A A A 3'
          AUAG UAA AUUUCU UCGACG G GA UG G AA AUGG GCC UCG UCGC
          UAUC GUU UAAGGA AGUUGU C CU GC C UUUGUC CGG AGC GGCG
sRNA 3' UUUAA GCGGG AA C GAAAAA G AC GG G C CGCAGACC CGGUAAGGGCAGAAAAACCGCUGUGUCCGCCACUAUCUUACUGGGCGGCGCAGUUUAU 5'

```

Alignment of the MtvR sRNA sequence with the mRNA targets tested. mfe: minimum folding energy; the putative start codon in highlighted in red lettering.

**Table S6:** Relative fold-change of MtvR putative mRNA targets

|                 | Wild-type |        | $\Delta hfq$ |        | Wild-type vs $\Delta hfq$ |        |        |
|-----------------|-----------|--------|--------------|--------|---------------------------|--------|--------|
|                 | - MtvR    | + MtvR | - MtvR       | + MtvR | MtvR                      | - MtvR | + MtvR |
| <i>MtvR</i>     | ND        | + 1.3  | - 6.3        | + 1.4  | + 2.6                     | - 20.4 | + 1.5  |
| <i>hfq</i>      | + 1.5     | - 6.9  | ND           | ND     | ND                        | ND     | ND     |
| <i>ompA</i>     | NC        | NC     | NC           | NC     | - 2.0                     | - 1.9  | - 1.3  |
| <i>ptsR</i>     | - 2.0     | NC     | - 3.0        | - 2.6  | + 2.9                     | - 1.7  | NC     |
| <i>fliO</i>     | NC        | NC     | - 1.5        | + 2.4  | + 2.7                     | + 3.9  | + 1.3  |
| <i>rhlE2</i>    | - 1.5     | + 1.4  | - 1.3        | NC     | NC                        | NC     | NC     |
| <i>flgH</i>     | - 1.3     | + 1.3  | - 1.9        | NC     | - 1.4                     | NC     | NC     |
| <i>gcvR</i>     | - 1.6     | NC     | - 2.7        | NC     | - 1.7                     | NC     | - 1.5  |
| <i>rpoN</i>     | + 1.5     | NC     | + 3.7        | - 1.2  | + 2.2                     | NC     | + 2.4  |
| <i>BCAL2048</i> | + 1.3     | - 7.1  | + 1.3        | - 1.5  | - 1.3                     | NC     | - 4.2  |
| <i>BCAL0444</i> | - 3.8     | NC     | - 2.0        | + 2.4  | + 6.2                     | + 3.0  | + 2.0  |
| <i>BCAL1089</i> | - 1.2     | NC     | - 1.5        | - 3.7  | - 1.6                     | NC     | + 1.7  |
| <i>rseA1</i>    | - 1.8     | + 1.2  | - 2.0        | NC     | + 1.2                     | + 1.2  | NC     |
| <i>rseA2</i>    | - 1.9     | + 3.7  | - 1.2        | + 1.7  | - 2.3                     | - 2.8  | NC     |
| <i>BCAL1039</i> | + 3.6     | NC     | NC           | + 1.2  | - 1.4                     | NC     | - 1.5  |
| <i>BCAL0365</i> | - 1.6     | + 1.9  | - 2.6        | + 3.5  | - 1.7                     | NC     | NC     |
| <i>mreC</i>     | + 1.6     | + 1.6  | - 1.2        | NC     | - 1.9                     | NC     | NC     |
| <i>bolA</i>     | NC        | + 1.2  | NC           | NC     | NC                        | NC     | NC     |
| <i>mpl</i>      | + 4.8     | + 1.5  | + 3.1        | NC     | NC                        | NC     | NC     |

ND, not determined; NC, no fold-change (NC:  $-1.2 < FC < 1.2$ ;  $p \leq 0.05$ ),  $SD < 0.01$  FC.



## Supplementary References

1. **Zhao Y, Li H, Hou Y, Cha L, Cao Y, Wang L, Ying X, Li W.** 2008. Construction of two mathematical models for prediction of bacterial sRNA targets. *Biochem. Biophys. Res Commun.* **372**:346-350.
2. **Rehmsmeier M, Steffen P, Höchsmann M, Giegerich R.** 2004. Fast and effective prediction of microRNA/target duplexes. *RNA* **10**:1507-1517.
3. **Bailey TL, Boden M, Buske FA, Frith M, Grant CE, Clementi L, Ren J, Li WW, Noble WS.** 2009. MEME Suite: tools for motif discovery and searching. *Nucleic Acids Res.* **37**:W202-W208.
4. **Thomson JD, Higgins DG, Gibson TJ.** 2004. CLUSTAL W: improving the sensitivity of progressive multiple sequence alignment through sequence weighting, position-specific gap penalties and weight matrix choice. *Nucleic Acids Res.* **22**:4673-4680.
5. **Sousa SA, Ramos CG, Moreira LM, Leitão JH.** 2010. The *hfq* gene is required for stress resistance and full virulence of *Burkholderia cepacia* to the nematode *Caenorhabditis elegans*. *Microbiology* **156**:896 - 908.
6. **Zuker M.** 2003. Mfold web server for nucleic acid folding and hybridization prediction. *Nucleic Acids Res.* **31**:3406-3415.
7. **Vandamme P, Holmes B, Coenye T, Goris J, Mahenthiralingam E, LiPuma JJ, Govan JRW.** 2003. *Burkholderia cenocepacia* sp. nov.--a new twist to an old story. *Res.n Microbiol.* **154**:91-96.
8. **Ramos CG, Sousa SA, Grilo AM, Feliciano JR, Leitão JH.** 2011. The second RNA chaperone Hfq2, is also required for survival to stress and the full virulence of *Burkholderia cenocepacia* J2315. *J. Bacteriol.* **193**:1515-1526.
9. **Lefebvre MD, Valvano MA.** 2002. Construction and evaluation of plasmid vectors optimized for constitutive and regulated gene expression in *Burkholderia cepacia* complex isolates. *Appl. Environ. Microbiol.* **68**:5956-5964.
10. **Kovach ME, Phillips RW, Elzer PH, Roop RM.** 1994. pBBR 1 MCS: a broad-host-range cloning vector. *BioTechn.* **16**:800-802.
